# Supplementary material for: Adsorption of Cr(vi) onto a magnetic CoFe2O4/MgAl-LDH composite and mechanism study
Source: Royal Society of Chemistry journal article supplement (doi:10.1039/c5ra06178d), 2015-01-01
Supplement: c5ra06178d1.pdf [file c5ra06178d1.pdf]

# **Electronic Supplementary information for**

## **Adsorption of Cr(VI) onto magnetic CoFe<sub>2</sub>O<sub>4</sub>/MgAl-LDH composite and mechanism study**

Lin Deng, Zhou Shi\*, Xiaoxu Peng

Key Laboratory of Building Safety and Energy Efficiency, Ministry of Education, Department of Water Engineering and Science, College of Civil Engineering, Hunan University, Changsha 410082, PR China

\*Corresponding author: Zhou Shi

Address: College of Civil Engineering, Yuelu Mountain, Hunan University, Changsha Hunan, 410082, China

E-mail address: 369329062@qq.com

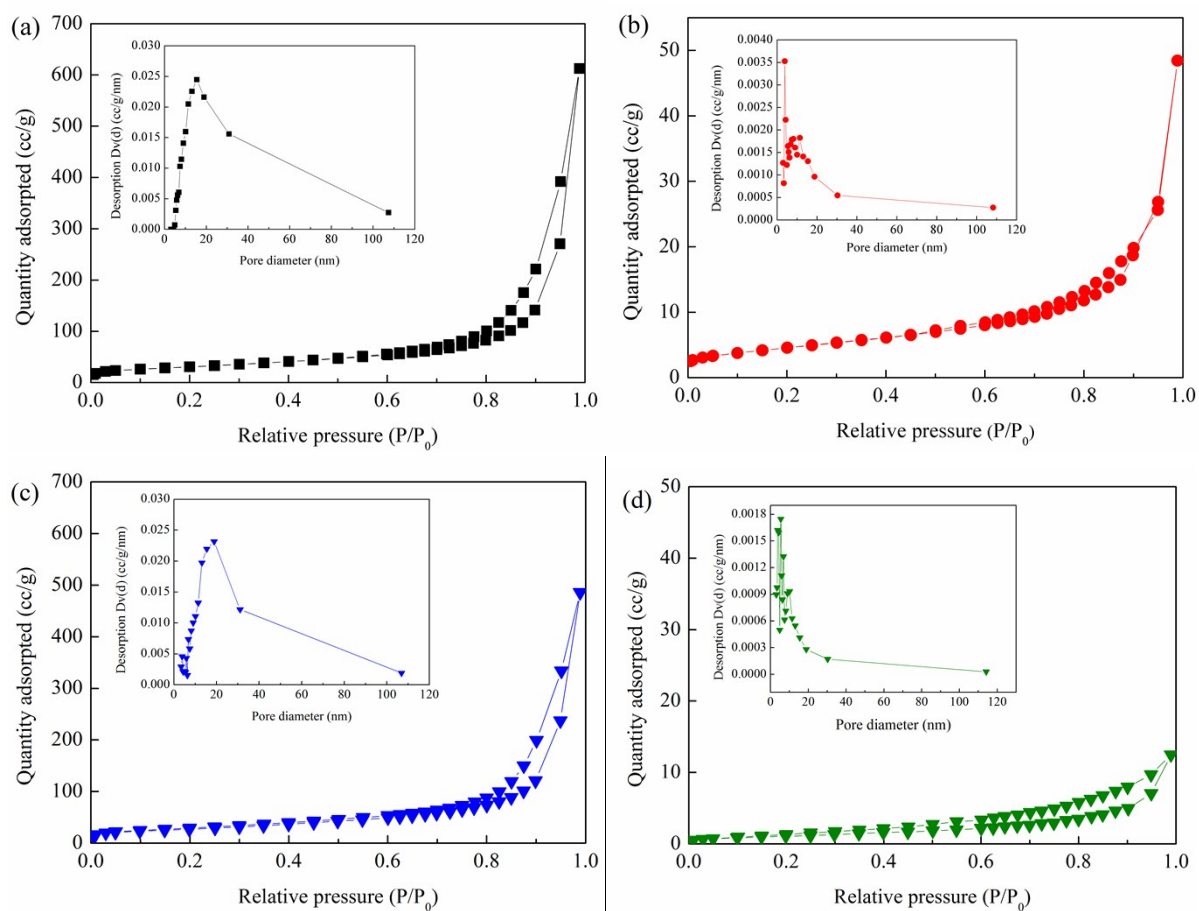

**Fig. S1** Nitrogen adsorption-desorption isotherms and pore size distribution of (a) MgAl-LDH, (b)  $\text{CoFe}_2\text{O}_4$ , (c)  $\text{CoFe}_2\text{O}_4/\text{MgAl-LDH}$ , and (d)  $\text{CoFe}_2\text{O}_4/\text{MgAl-LDH}$  after Cr(VI) adsorption.

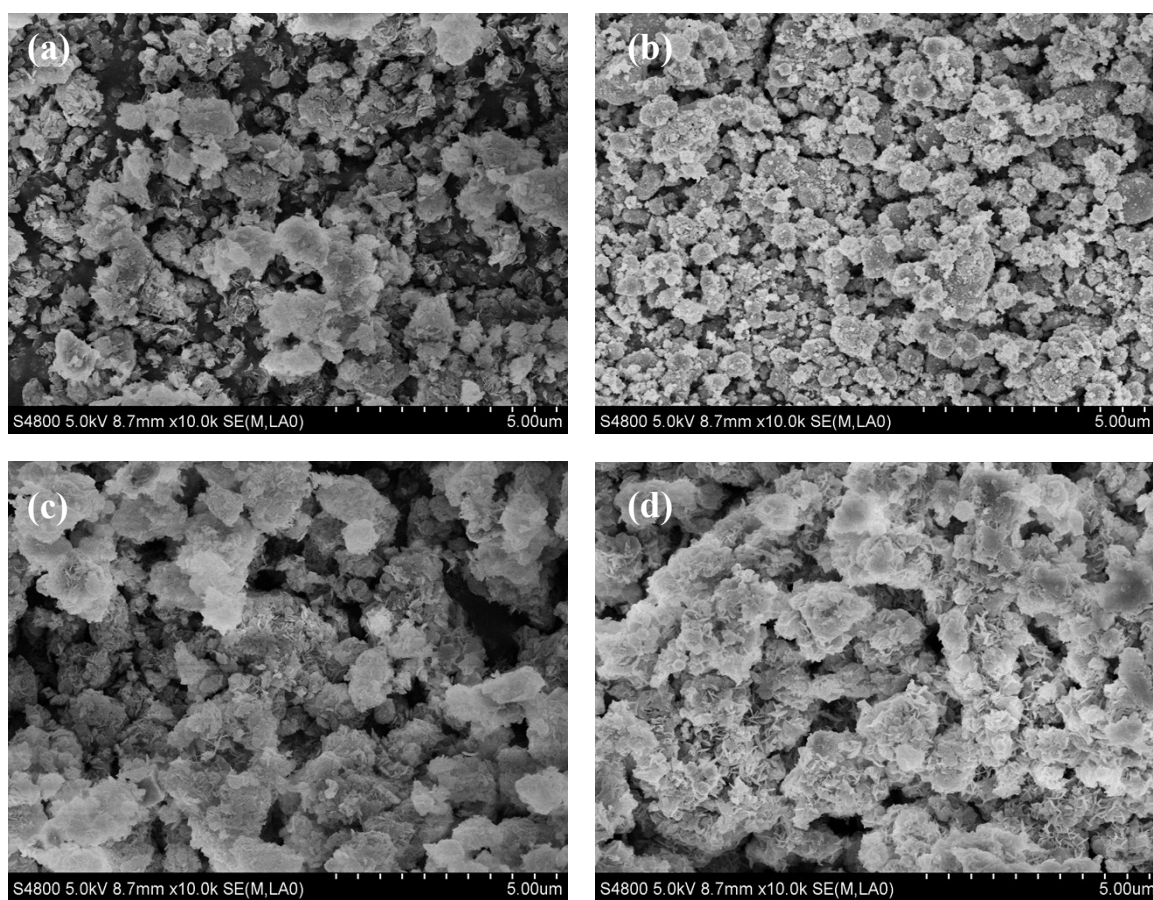

**Fig. S2** SEM of (a) MgAl-LDH, (b) CoFe<sub>2</sub>O<sub>4</sub>, (c) CoFe<sub>2</sub>O<sub>4</sub>/MgAl-LDH, and (d) CoFe<sub>2</sub>O<sub>4</sub>/MgAl-LDH after Cr(VI) adsorption.

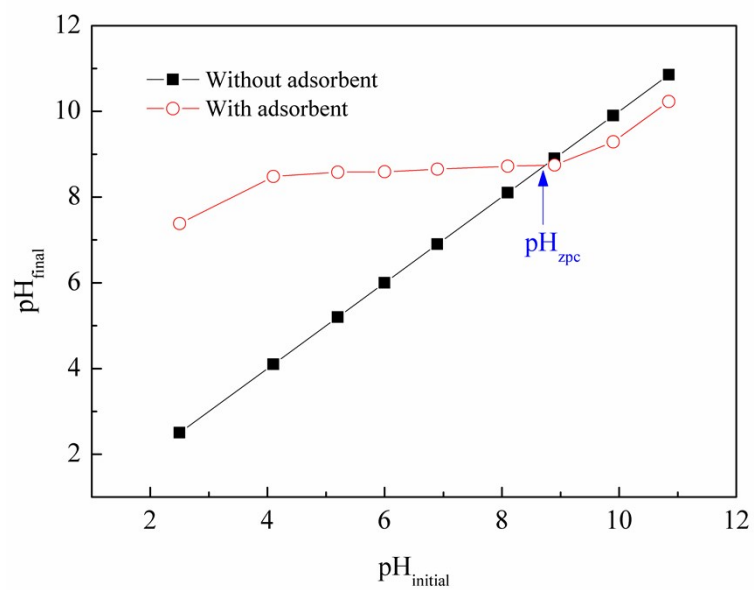

**Fig. S3** Illustration of the  $\text{pH}_{\text{zpc}}$  of  $\text{CoFe}_2\text{O}_4/\text{MgAl-LDH}$ .

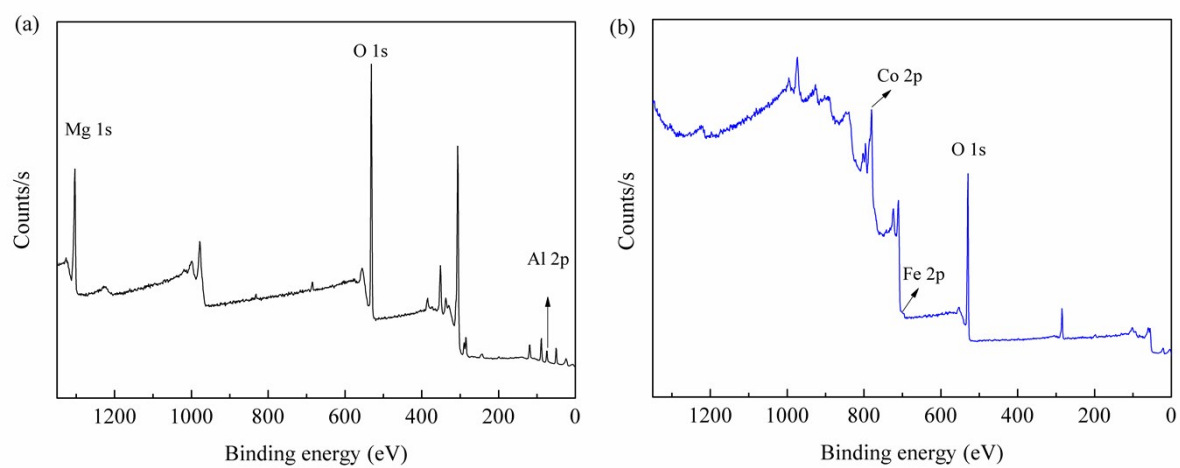

**Fig. S4** Wide XPS spectra of (a) MgAl-LDH, (b) CoFe<sub>2</sub>O<sub>4</sub>.

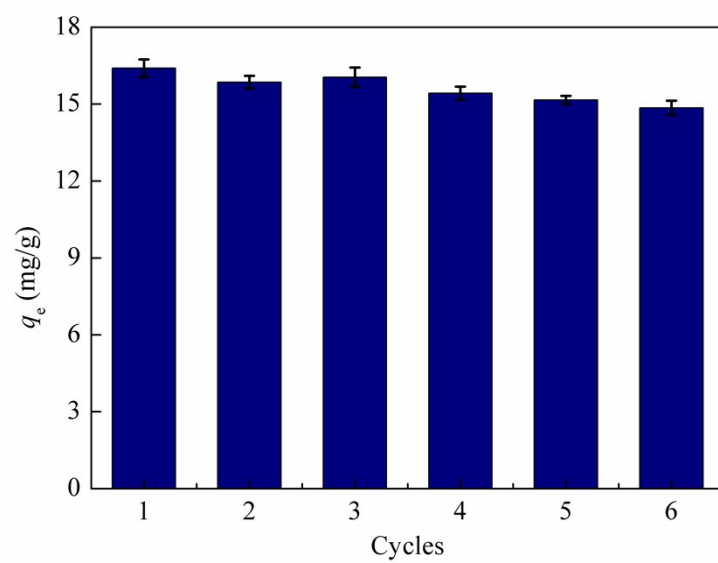

**Fig. S5** Sixth consecutive adsorption-desorption cycles of  $\text{CoFe}_2\text{O}_4/\text{MgAl-LDH}$ .
